# Supplementary material for: Tuberculosis Incidence and Mortality Trends in Mainland China, 2004-2024: Control Program and Elimination Progress
Source: Research Square preprint supplement (doi:10.21203/rs.3.rs-8318476/v1), 2025-12-22
Supplement: Supplementary file 1 [file 1a37ccd813af4730db9bbf61.docx]

**Supplementary Materials**

**Tuberculosis Incidence and Mortality Trends in Mainland China, 2004-2024: Control Program and Elimination Progress**

**1 Methods**

**1.1 SARIMA Fitting and Forecasting Process**

1.1.1 Incidence:

(1)Stationarity Test

Stationarity is a prerequisite for SARIMA modeling. The Augmented Dickey-Fuller (ADF) test was applied to the preprocessed training set data (d_train) to verify stationarity. The null hypothesis of the test is "the sequence is non-stationary"; a p-value < 0.05 rejects the null hypothesis, indicating a stationary sequence. Results showed an ADF test statistic of -6.4395, a lag order of 5, and a p-value of 0.01, confirming that the training set data meets the stationarity requirement and is suitable for subsequent model parameter fitting.

1. Non-White Noise Test

To ensure the modeling data contains extractable valid information (e.g., trends, seasonality), the Box-Ljung test was performed on the stationary training set data. The null hypothesis is "the sequence is white noise (no valid information)"; a p-value < 0.1 rejects the null hypothesis, indicating a non-white noise sequence. Results revealed a test statistic (X-squared) of 109.82, degrees of freedom (df) of 24, and a p-value < 0.001, confirming significant non-random fluctuation characteristics in the data, which is of modeling value.

1. Residual White Noise Test

After model fitting, residual analysis was conducted to verify the sufficiency of information extraction. The Box-Ljung test was applied to the residuals of the SARIMA model (sarima_model$residuals). The null hypothesis is "the residuals are white noise (sufficient information extracted)"; a p-value > 0.05 accepts the null hypothesis, indicating the model does not miss valid information and exhibits good fitting performance. Results showed a test statistic (X-squared) of 32.902, degrees of df of 24, and a p-value of 0.1062, demonstrating that the model residuals satisfy the white noise property. The model has fully captured the time series patterns of tuberculosis incidence in China, confirming its validity and reliability.

1.1.2 Death

1. Stationarity Test

Stationarity is a prerequisite for SARIMA modeling. The Augmented Dickey-Fuller (ADF) test was applied to the preprocessed training set data (d_train) to verify stationarity. The null hypothesis of the test is "the sequence is non-stationary"; a p-value < 0.05 rejects the null hypothesis, indicating a stationary sequence. Results showed a Dickey-Fuller test statistic of -5.8895, a lag order of 5, and a p-value of 0.01, confirming that the training set data meets the stationarity requirement and is suitable for subsequent model parameter fitting.

(2)Non-White Noise Test

To ensure the modeling data contains extractable valid information (e.g., trends, seasonality), the Box-Ljung test was performed on the stationary training set data. The null hypothesis is "the sequence is white noise (no valid information)"; a p-value < 0.1 rejects the null hypothesis, indicating a non-white noise sequence. Results revealed a test statistic (X-squared) of 87.806, degrees of freedom (df) of 24, and a p-value of 3.316e-09, confirming significant non-random fluctuation characteristics in the data, which is of modeling value.

(3)Residual White Noise Test

After model fitting, residual analysis was conducted to verify the sufficiency of information extraction. The Box-Ljung test was applied to the residuals of the SARIMA model (sarima_model$residuals). The null hypothesis is "the residuals are white noise (sufficient information extracted)"; a p-value > 0.05 accepts the null hypothesis, indicating the model does not miss valid information and exhibits good fitting performance. Results showed a test statistic (X-squared) of 22.727, degrees of freedom (df) of 24, and a p-value of 0.536 (> 0.05), demonstrating that the model residuals satisfy the white noise property. The model has fully captured the time series patterns of tuberculosis mortality in China, confirming its validity and reliability.

**1.2 Calculation Formulas of Evaluation Indicators**

(1)Mean Squared Error(MSE):

(2)Root Mean Squared Error(RMSE):

(3)Mean Absolute Error(MAE):

(4)Mean Absolute Percentage Error(MAPE):

)

(5)Symmetric Mean Absolute Percentage Error(sMAPE):

In these formulae, *n* represents the sample size, represents the monthly actual incidence/death rate of tuberculosis for each month, and represents the predicted incidence/death rate.

| **TableS1**. SARIMA parameter selection for tuberculosis incidence | |
| --- | --- |
| SARIMA Model Specification | AICc Value |
| ARIMA(0,1,0)(0,1,0)[12] | 291.9749 |
| ARIMA(0,1,0)(0,1,1)[12] | 271.3647 |
| ARIMA(0,1,0)(0,1,2)[12] | 273.349 |
| ARIMA(0,1,0)(1,1,0)[12] | 233.1834 |
| ARIMA(0,1,0)(1,1,1)[12] | 181.3777 |
| ARIMA(0,1,0)(1,1,2)[12] | 183.2752 |
| ARIMA(0,1,0)(2,1,0)[12] | 182.9489 |
| ARIMA(0,1,0)(2,1,1)[12] | 170.8715 |
| ARIMA(0,1,0)(2,1,2)[12] | 169.6691 |
| ARIMA(0,1,1)(0,1,0)[12] | 273.4581 |
| ARIMA(0,1,1)(0,1,1)[12] | 250.2817 |
| ARIMA(0,1,1)(0,1,2)[12] | 252.1987 |
| ARIMA(0,1,1)(1,1,0)[12] | 206.0766 |
| ARIMA(0,1,1)(1,1,1)[12] | 172.9456 |
| ARIMA(0,1,1)(1,1,2)[12] | 173.6157 |
| ARIMA(0,1,1)(2,1,0)[12] | 157.0221 |
| ARIMA(0,1,1)(2,1,1)[12] | 157.8881 |
| ARIMA(0,1,1)(2,1,2)[12] | 159.8173 |
| ARIMA(0,1,2)(0,1,0)[12] | 272.6219 |
| ARIMA(0,1,2)(0,1,1)[12] | 249.2137 |
| ARIMA(0,1,2)(0,1,2)[12] | 251.3427 |
| ARIMA(0,1,2)(1,1,0)[12] | 198.0262 |
| ARIMA(0,1,2)(1,1,1)[12] | 165.8177 |
| ARIMA(0,1,2)(1,1,2)[12] | 167.601 |
| ARIMA(0,1,2)(2,1,0)[12] | 149.6831 |
| ARIMA(0,1,2)(2,1,1)[12] | 148.6903 |
| ARIMA(0,1,3)(0,1,0)[12] | 272.7257 |
| ARIMA(0,1,3)(0,1,1)[12] | 250.9453 |
| ARIMA(0,1,3)(0,1,2)[12] | 253.1012 |
| ARIMA(0,1,3)(1,1,0)[12] | 200.0319 |
| ARIMA(0,1,3)(1,1,1)[12] | 167.7142 |
| ARIMA(0,1,3)(2,1,0)[12] | 151.7407 |
| ARIMA(0,1,4)(0,1,0)[12] | 269.2418 |
| ARIMA(0,1,4)(0,1,1)[12] | 249.842 |
| ARIMA(0,1,4)(1,1,0)[12] | 201.3513 |
| ARIMA(0,1,5)(0,1,0)[12] | 271.3887 |
| ARIMA(1,1,0)(0,1,0)[12] | 278.9293 |
| ARIMA(1,1,0)(0,1,1)[12] | 257.0416 |
| ARIMA(1,1,0)(0,1,2)[12] | 258.6023 |
| ARIMA(1,1,0)(1,1,0)[12] | 222.211 |
| ARIMA(1,1,0)(1,1,1)[12] | 174.9417 |
| ARIMA(1,1,0)(1,1,2)[12] | 176.5276 |
| ARIMA(1,1,0)(2,1,0)[12] | 160.9754 |
| ARIMA(1,1,0)(2,1,1)[12] | 151.8448 |
| ARIMA(1,1,0)(2,1,2)[12] | 152.0857 |
| ARIMA(1,1,1)(0,1,0)[12] | 280.0633 |
| ARIMA(1,1,1)(0,1,1)[12] | 256.7437 |
| ARIMA(1,1,1)(0,1,2)[12] | 258.71 |
| ARIMA(1,1,1)(1,1,0)[12] | 213.087 |
| ARIMA(1,1,1)(1,1,1)[12] | 169.8491 |
| ARIMA(1,1,1)(1,1,2)[12] | 171.4277 |
| ARIMA(1,1,1)(2,1,0)[12] | 147.4949 |
| ARIMA(1,1,1)(2,1,1)[12] | Inf |
| ARIMA(1,1,2)(0,1,0)[12] | 269.4121 |
| ARIMA(1,1,2)(0,1,1)[12] | 249.1294 |
| ARIMA(1,1,2)(0,1,2)[12] | 251.2776 |
| ARIMA(1,1,2)(1,1,0)[12] | 205.071 |
| ARIMA(1,1,2)(1,1,1)[12] | 166.2831 |
| ARIMA(1,1,2)(2,1,0)[12] | 142.5566 |
| ARIMA(1,1,3)(0,1,0)[12] | 271.5026 |
| ARIMA(1,1,3)(0,1,1)[12] | 251.19 |
| ARIMA(1,1,3)(1,1,0)[12] | 206.15 |
| ARIMA(1,1,4)(0,1,0)[12] | 271.5067 |
| ARIMA(2,1,0)(0,1,0)[12] | 251.7884 |
| ARIMA(2,1,0)(0,1,1)[12] | 243.7617 |
| ARIMA(2,1,0)(0,1,2)[12] | 245.2535 |
| ARIMA(2,1,0)(1,1,0)[12] | 193.6201 |
| ARIMA(2,1,0)(1,1,1)[12] | 169.4814 |
| ARIMA(2,1,0)(1,1,2)[12] | 170.8765 |
| ARIMA(2,1,0)(2,1,0)[12] | 151.0033 |
| ARIMA(2,1,0)(2,1,1)[12] | 143.0213 |
| ARIMA(2,1,1)(0,1,0)[12] | 251.199 |
| ARIMA(2,1,1)(0,1,1)[12] | 243.7409 |
| ARIMA(2,1,1)(0,1,2)[12] | 245.2635 |
| ARIMA(2,1,1)(1,1,0)[12] | 173.0242 |
| ARIMA(2,1,1)(1,1,1)[12] | Inf |
| ARIMA(2,1,1)(2,1,0)[12] | Inf |
| ARIMA(2,1,2)(0,1,0)[12] | 253.2116 |
| ARIMA(2,1,2)(0,1,1)[12] | 245.8913 |
| ARIMA(2,1,2)(1,1,0)[12] | 172.0451 |
| ARIMA(2,1,3)(0,1,0)[12] | 255.2291 |
| ARIMA(3,1,0)(0,1,0)[12] | 248.5722 |
| ARIMA(3,1,0)(0,1,1)[12] | 243.9788 |
| ARIMA(3,1,0)(0,1,2)[12] | 244.7978 |
| ARIMA(3,1,0)(1,1,0)[12] | 187.816 |
| ARIMA(3,1,0)(1,1,1)[12] | 168.7096 |
| ARIMA(3,1,0)(2,1,0)[12] | 152.2979 |
| ARIMA(3,1,1)(0,1,0)[12] | 247.3796 |
| ARIMA(3,1,1)(0,1,1)[12] | 244.2847 |
| ARIMA(3,1,1)(1,1,0)[12] | 175.92 |
| ARIMA(3,1,2)(0,1,0)[12] | 248.5377 |
| ARIMA(4,1,0)(0,1,0)[12] | 240.0066 |
| ARIMA(4,1,0)(0,1,1)[12] | 237.175 |
| ARIMA(4,1,0)(1,1,0)[12] | 182.9299 |
| ARIMA(4,1,1)(0,1,0)[12] | 242.1627 |
| ARIMA(5,1,0)(0,1,0)[12] | 242.9696 |
| SARIMA:Seasonal Autoregressive Integrated Moving Average; AICc:Corrected Akaike Information Criterion | |

| **TableS2**. SARIMA parameter selection for tuberculosis death | |
| --- | --- |
| SARIMA Model Specification | AICc Value |
| ARIMA(0,1,0) | -1436.606 |
| ARIMA(0,1,0) | -1434.585 |
| ARIMA(0,1,0)(0,0,1)[12] | -1446.566 |
| ARIMA(0,1,0)(0,0,1)[12] | -1444.518 |
| ARIMA(0,1,0)(0,0,2)[12] | -1447.413 |
| ARIMA(0,1,0)(0,0,2)[12] | -1445.336 |
| ARIMA(0,1,0)(1,0,0)[12] | -1442.504 |
| ARIMA(0,1,0)(1,0,0)[12] | -1440.434 |
| ARIMA(0,1,0)(1,0,1)[12] | -1452.589 |
| ARIMA(0,1,0)(1,0,1)[12] | -1450.541 |
| ARIMA(0,1,0)(1,0,2)[12] | -1450.565 |
| ARIMA(0,1,0)(1,0,2)[12] | -1448.497 |
| ARIMA(0,1,0)(2,0,0)[12] | -1446.101 |
| ARIMA(0,1,0)(2,0,0)[12] | -1444.007 |
| ARIMA(0,1,0)(2,0,1)[12] | -1452.901 |
| ARIMA(0,1,0)(2,0,1)[12] | -1450.783 |
| ARIMA(0,1,0)(2,0,2)[12] | -1450.85 |
| ARIMA(0,1,0)(2,0,2)[12] | -1448.707 |
| ARIMA(0,1,1) | -1442.019 |
| ARIMA(0,1,1) | -1439.993 |
| ARIMA(0,1,1)(0,0,1)[12] | -1453.604 |
| ARIMA(0,1,1)(0,0,1)[12] | -1451.552 |
| ARIMA(0,1,1)(0,0,2)[12] | -1456.653 |
| ARIMA(0,1,1)(0,0,2)[12] | -1454.574 |
| ARIMA(0,1,1)(1,0,0)[12] | -1451.49 |
| ARIMA(0,1,1)(1,0,0)[12] | -1449.4 |
| ARIMA(0,1,1)(1,0,1)[12] | -1465.356 |
| ARIMA(0,1,1)(1,0,1)[12] | -1463.381 |
| ARIMA(0,1,1)(1,0,2)[12] | -1463.24 |
| ARIMA(0,1,1)(1,0,2)[12] | -1461.243 |
| ARIMA(0,1,1)(2,0,0)[12] | -1468.924 |
| ARIMA(0,1,1)(2,0,0)[12] | -1466.809 |
| ARIMA(0,1,1)(2,0,1)[12] | -1484.535 |
| ARIMA(0,1,1)(2,0,1)[12] | -1482.395 |
| ARIMA(0,1,1)(2,0,2)[12] | -1482.434 |
| ARIMA(0,1,1)(2,0,2)[12] | -1480.267 |
| ARIMA(0,1,2) | -1441.227 |
| ARIMA(0,1,2) | -1439.181 |
| ARIMA(0,1,2)(0,0,1)[12] | -1451.892 |
| ARIMA(0,1,2)(0,0,1)[12] | -1449.818 |
| ARIMA(0,1,2)(0,0,2)[12] | -1455.41 |
| ARIMA(0,1,2)(0,0,2)[12] | -1453.315 |
| ARIMA(0,1,2)(1,0,0)[12] | -1449.834 |
| ARIMA(0,1,2)(1,0,0)[12] | -1447.722 |
| ARIMA(0,1,2)(1,0,1)[12] | -1464.668 |
| ARIMA(0,1,2)(1,0,1)[12] | -1462.739 |
| ARIMA(0,1,2)(1,0,2)[12] | -1462.566 |
| ARIMA(0,1,2)(1,0,2)[12] | -1460.605 |
| ARIMA(0,1,2)(2,0,0)[12] | -1468.1 |
| ARIMA(0,1,2)(2,0,0)[12] | -1465.968 |
| ARIMA(0,1,2)(2,0,1)[12] | -1483.986 |
| ARIMA(0,1,2)(2,0,1)[12] | -1481.826 |
| ARIMA(0,1,3) | -1439.141 |
| ARIMA(0,1,3) | -1437.072 |
| ARIMA(0,1,3)(0,0,1)[12] | -1450.087 |
| ARIMA(0,1,3)(0,0,1)[12] | -1447.982 |
| ARIMA(0,1,3)(0,0,2)[12] | -1453.286 |
| ARIMA(0,1,3)(0,0,2)[12] | -1451.162 |
| ARIMA(0,1,3)(1,0,0)[12] | -1447.953 |
| ARIMA(0,1,3)(1,0,0)[12] | -1445.811 |
| ARIMA(0,1,3)(1,0,1)[12] | -1462.971 |
| ARIMA(0,1,3)(1,0,1)[12] | -1460.96 |
| ARIMA(0,1,3)(2,0,0)[12] | -1466.457 |
| ARIMA(0,1,3)(2,0,0)[12] | -1464.293 |
| ARIMA(0,1,4) | -1438.896 |
| ARIMA(0,1,4) | -1436.834 |
| ARIMA(0,1,4)(0,0,1)[12] | -1447.943 |
| ARIMA(0,1,4)(0,0,1)[12] | -1445.813 |
| ARIMA(0,1,4)(1,0,0)[12] | -1445.859 |
| ARIMA(0,1,4)(1,0,0)[12] | -1443.689 |
| ARIMA(0,1,5) | -1451.129 |
| ARIMA(0,1,5) | -1449.055 |
| ARIMA(1,1,0) | -1439.465 |
| ARIMA(1,1,0) | -1437.433 |
| ARIMA(1,1,0)(0,0,1)[12] | -1451.13 |
| ARIMA(1,1,0)(0,0,1)[12] | -1449.081 |
| ARIMA(1,1,0)(0,0,2)[12] | -1453.206 |
| ARIMA(1,1,0)(0,0,2)[12] | -1451.133 |
| ARIMA(1,1,0)(1,0,0)[12] | -1449.963 |
| ARIMA(1,1,0)(1,0,0)[12] | -1447.883 |
| ARIMA(1,1,0)(1,0,1)[12] | -1460.95 |
| ARIMA(1,1,0)(1,0,1)[12] | -1458.977 |
| ARIMA(1,1,0)(1,0,2)[12] | -1458.832 |
| ARIMA(1,1,0)(1,0,2)[12] | -1456.832 |
| ARIMA(1,1,0)(2,0,0)[12] | -1460.97 |
| ARIMA(1,1,0)(2,0,0)[12] | -1458.856 |
| ARIMA(1,1,0)(2,0,1)[12] | -1468.508 |
| ARIMA(1,1,0)(2,0,1)[12] | -1466.369 |
| ARIMA(1,1,0)(2,0,2)[12] | -1466.41 |
| ARIMA(1,1,0)(2,0,2)[12] | -1464.246 |
| ARIMA(1,1,1) | -1446.416 |
| ARIMA(1,1,1) | -1444.352 |
| ARIMA(1,1,1)(0,0,1)[12] | -1455.753 |
| ARIMA(1,1,1)(0,0,1)[12] | -1453.651 |
| ARIMA(1,1,1)(0,0,2)[12] | -1458.314 |
| ARIMA(1,1,1)(0,0,2)[12] | -1456.215 |
| ARIMA(1,1,1)(1,0,0)[12] | -1461.975 |
| ARIMA(1,1,1)(1,0,0)[12] | -1462.048 |
| ARIMA(1,1,1)(1,0,1)[12] | -1469.603 |
| ARIMA(1,1,1)(1,0,1)[12] | -1468.496 |
| ARIMA(1,1,1)(1,0,2)[12] | -1467.953 |
| ARIMA(1,1,1)(1,0,2)[12] | -1466.766 |
| ARIMA(1,1,1)(2,0,0)[12] | -1474.682 |
| ARIMA(1,1,1)(2,0,0)[12] | -1473.422 |
| ARIMA(1,1,1)(2,0,1)[12] | -1483.637 |
| ARIMA(1,1,1)(2,0,1)[12] | -1481.63 |
| ARIMA(1,1,2) | -1438.134 |
| ARIMA(1,1,2) | -1436.058 |
| ARIMA(1,1,2)(0,0,1)[12] | -1448.829 |
| ARIMA(1,1,2)(0,0,1)[12] | -1446.736 |
| ARIMA(1,1,2)(0,0,2)[12] | -1452.257 |
| ARIMA(1,1,2)(0,0,2)[12] | -1450.149 |
| ARIMA(1,1,2)(1,0,0)[12] | -1460.06 |
| ARIMA(1,1,2)(1,0,0)[12] | -1460.021 |
| ARIMA(1,1,2)(1,0,1)[12] | -1469.48 |
| ARIMA(1,1,2)(1,0,1)[12] | -1468.483 |
| ARIMA(1,1,2)(2,0,0)[12] | -1474.263 |
| ARIMA(1,1,2)(2,0,0)[12] | -1472.994 |
| ARIMA(1,1,3) | -1436.018 |
| ARIMA(1,1,3) | -1433.917 |
| ARIMA(1,1,3)(0,0,1)[12] | -1446.932 |
| ARIMA(1,1,3)(0,0,1)[12] | -1444.807 |
| ARIMA(1,1,3)(1,0,0)[12] | -1458.189 |
| ARIMA(1,1,3)(1,0,0)[12] | -1458.177 |
| ARIMA(1,1,4) | -1444.491 |
| ARIMA(1,1,4) | -1442.348 |
| ARIMA(2,1,0) | -1440.334 |
| ARIMA(2,1,0) | -1438.262 |
| ARIMA(2,1,0)(0,0,1)[12] | -1450.5 |
| ARIMA(2,1,0)(0,0,1)[12] | -1448.419 |
| ARIMA(2,1,0)(0,0,2)[12] | -1453.353 |
| ARIMA(2,1,0)(0,0,2)[12] | -1451.262 |
| ARIMA(2,1,0)(1,0,0)[12] | -1453.027 |
| ARIMA(2,1,0)(1,0,0)[12] | -1450.98 |
| ARIMA(2,1,0)(1,0,1)[12] | -1470.478 |
| ARIMA(2,1,0)(1,0,1)[12] | -1469.006 |
| ARIMA(2,1,0)(1,0,2)[12] | -1468.464 |
| ARIMA(2,1,0)(1,0,2)[12] | -1466.919 |
| ARIMA(2,1,0)(2,0,0)[12] | -1472.601 |
| ARIMA(2,1,0)(2,0,0)[12] | -1470.53 |
| ARIMA(2,1,0)(2,0,1)[12] | -1487.002 |
| ARIMA(2,1,0)(2,0,1)[12] | -1484.964 |
| ARIMA(2,1,1) | -1438.241 |
| ARIMA(2,1,1) | -1436.145 |
| ARIMA(2,1,1)(0,0,1)[12] | -1448.387 |
| ARIMA(2,1,1)(0,0,1)[12] | -1446.281 |
| ARIMA(2,1,1)(0,0,2)[12] | -1451.209 |
| ARIMA(2,1,1)(0,0,2)[12] | -1449.093 |
| ARIMA(2,1,1)(1,0,0)[12] | -1456.53 |
| ARIMA(2,1,1)(1,0,0)[12] | -1455.505 |
| ARIMA(2,1,1)(1,0,1)[12] | -1470.369 |
| ARIMA(2,1,1)(1,0,1)[12] | -1469.323 |
| ARIMA(2,1,1)(2,0,0)[12] | -1474.698 |
| ARIMA(2,1,1)(2,0,0)[12] | -1472.854 |
| ARIMA(2,1,2) | -1438.335 |
| ARIMA(2,1,2) | -1436.249 |
| ARIMA(2,1,2)(0,0,1)[12] | -1448.23 |
| ARIMA(2,1,2)(0,0,1)[12] | -1446.121 |
| ARIMA(2,1,2)(1,0,0)[12] | -1455.315 |
| ARIMA(2,1,2)(1,0,0)[12] | -1454.835 |
| ARIMA(2,1,3) | -1436.427 |
| ARIMA(2,1,3) | -1434.32 |
| ARIMA(3,1,0) | -1437.448 |
| ARIMA(3,1,0) | -1435.342 |
| ARIMA(3,1,0)(0,0,1)[12] | -1447.134 |
| ARIMA(3,1,0)(0,0,1)[12] | -1445.032 |
| ARIMA(3,1,0)(0,0,2)[12] | -1449.711 |
| ARIMA(3,1,0)(0,0,2)[12] | -1447.62 |
| ARIMA(3,1,0)(1,0,0)[12] | -1456.82 |
| ARIMA(3,1,0)(1,0,0)[12] | -1454.917 |
| ARIMA(3,1,0)(1,0,1)[12] | -1473.954 |
| ARIMA(3,1,0)(1,0,1)[12] | -1473.054 |
| ARIMA(3,1,0)(2,0,0)[12] | -1475.156 |
| ARIMA(3,1,0)(2,0,0)[12] | -1473.208 |
| ARIMA(3,1,1) | -1435.472 |
| ARIMA(3,1,1) | -1433.336 |
| ARIMA(3,1,1)(0,0,1)[12] | -1445.199 |
| ARIMA(3,1,1)(0,0,1)[12] | -1443.06 |
| ARIMA(3,1,1)(1,0,0)[12] | -1455.315 |
| ARIMA(3,1,1)(1,0,0)[12] | -1453.483 |
| ARIMA(3,1,2) | -1435.133 |
| ARIMA(3,1,2) | -1433.054 |
| ARIMA(4,1,0) | -1435.649 |
| ARIMA(4,1,0) | -1433.507 |
| ARIMA(4,1,0)(0,0,1)[12] | -1446.676 |
| ARIMA(4,1,0)(0,0,1)[12] | -1444.528 |
| ARIMA(4,1,0)(1,0,0)[12] | -1457.654 |
| ARIMA(4,1,0)(1,0,0)[12] | -1455.816 |
| ARIMA(4,1,1) | -1435.253 |
| ARIMA(4,1,1) | -1433.09 |
| ARIMA(5,1,0) | -1438.867 |
| ARIMA(5,1,0) | -1436.706 |
| SARIMA:Seasonal Autoregressive Integrated Moving Average; AICc:Corrected Akaike Information Criterion | |


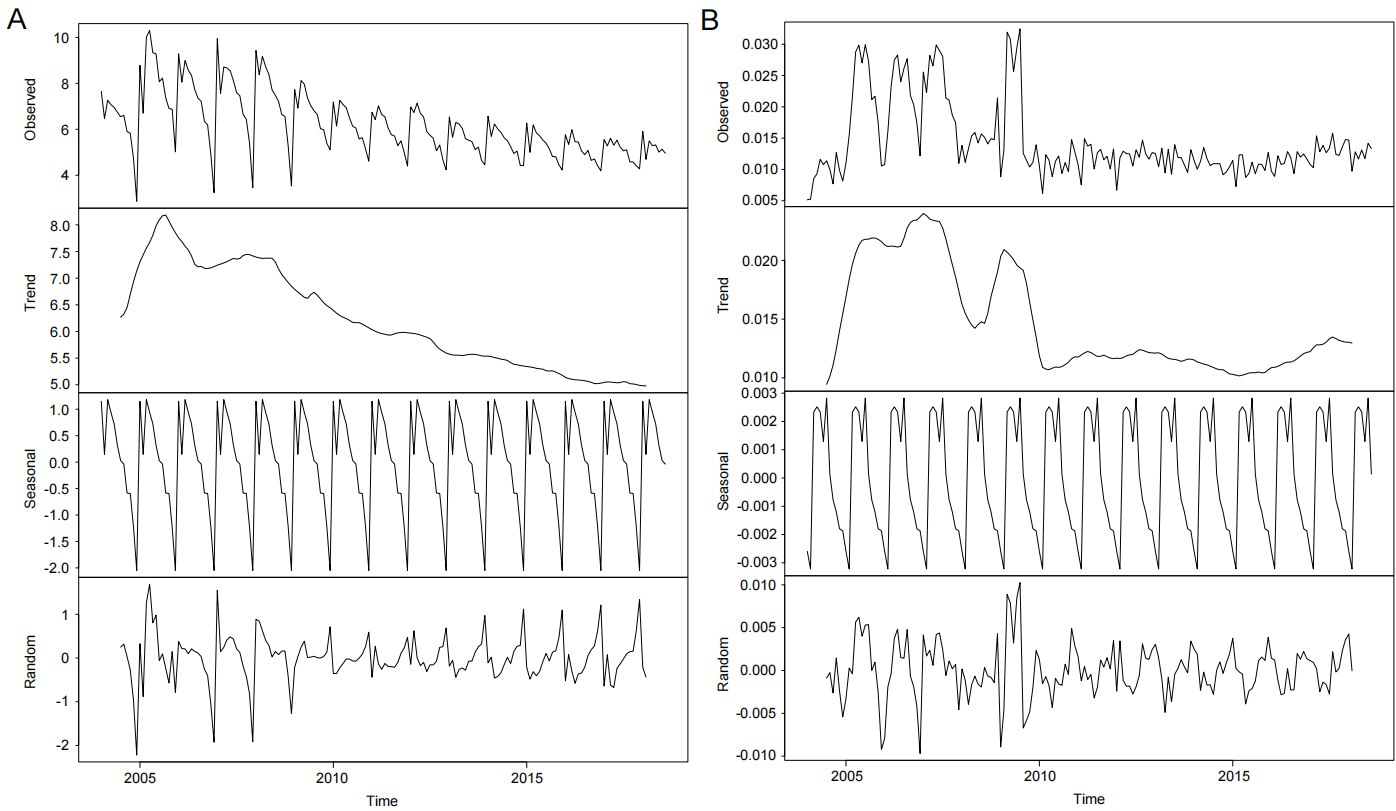
**Figure S1**. Decomposition plots of trend, seasonal, and random components in the training set (A. Incidence rate; B. Mortality rate)


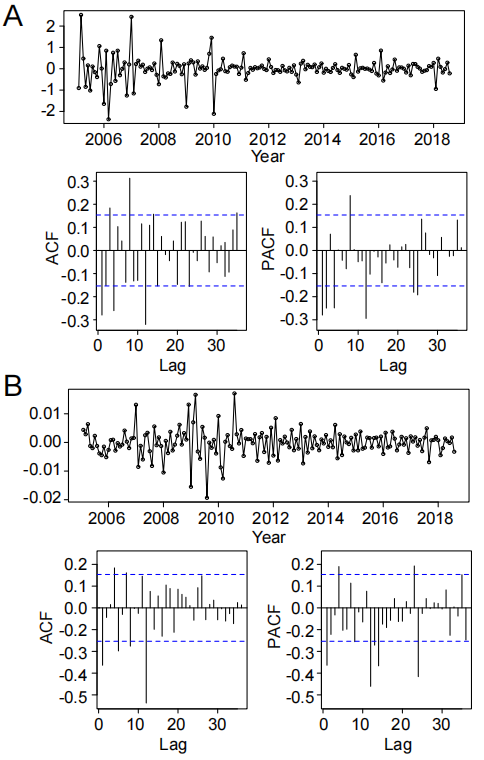


**FigureS2**. Autocorrelation Function and Partial Autocorrelation Function Plots of the Differenced Series (A. Incidence rate; B. Mortality rate)

**Results**


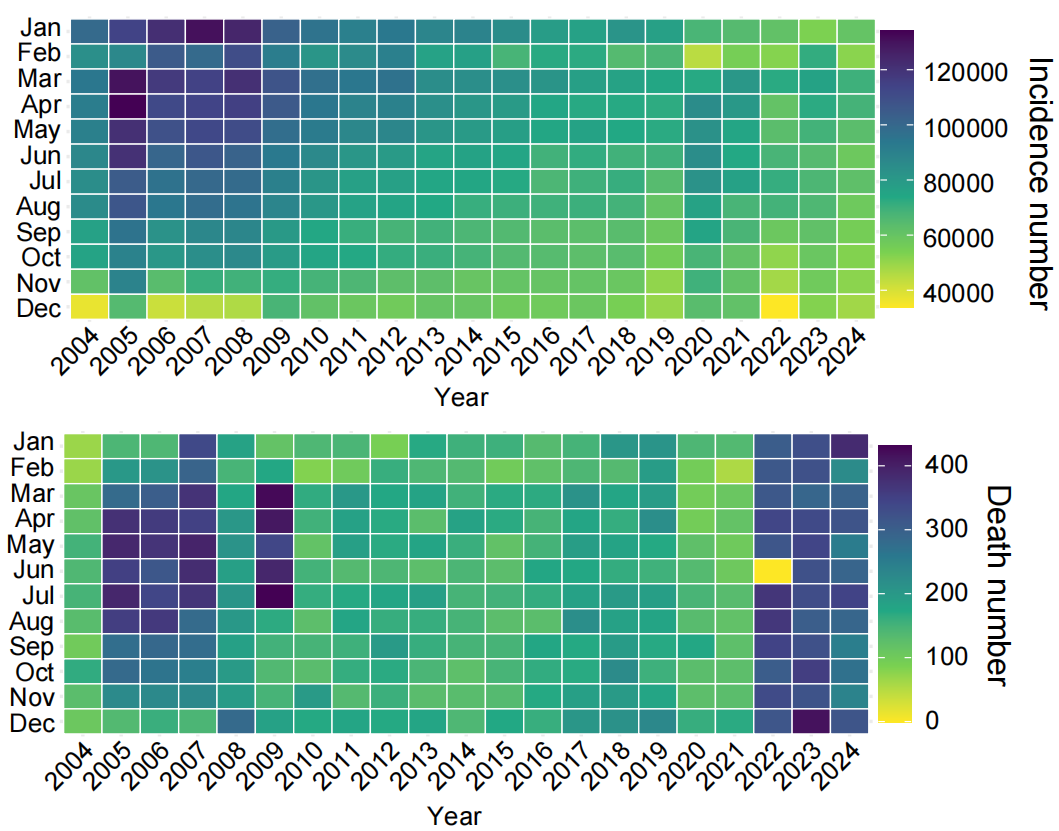


**FigureS3**. Temporal Distribution of Tuberculosis Incidence and Mortality Counts


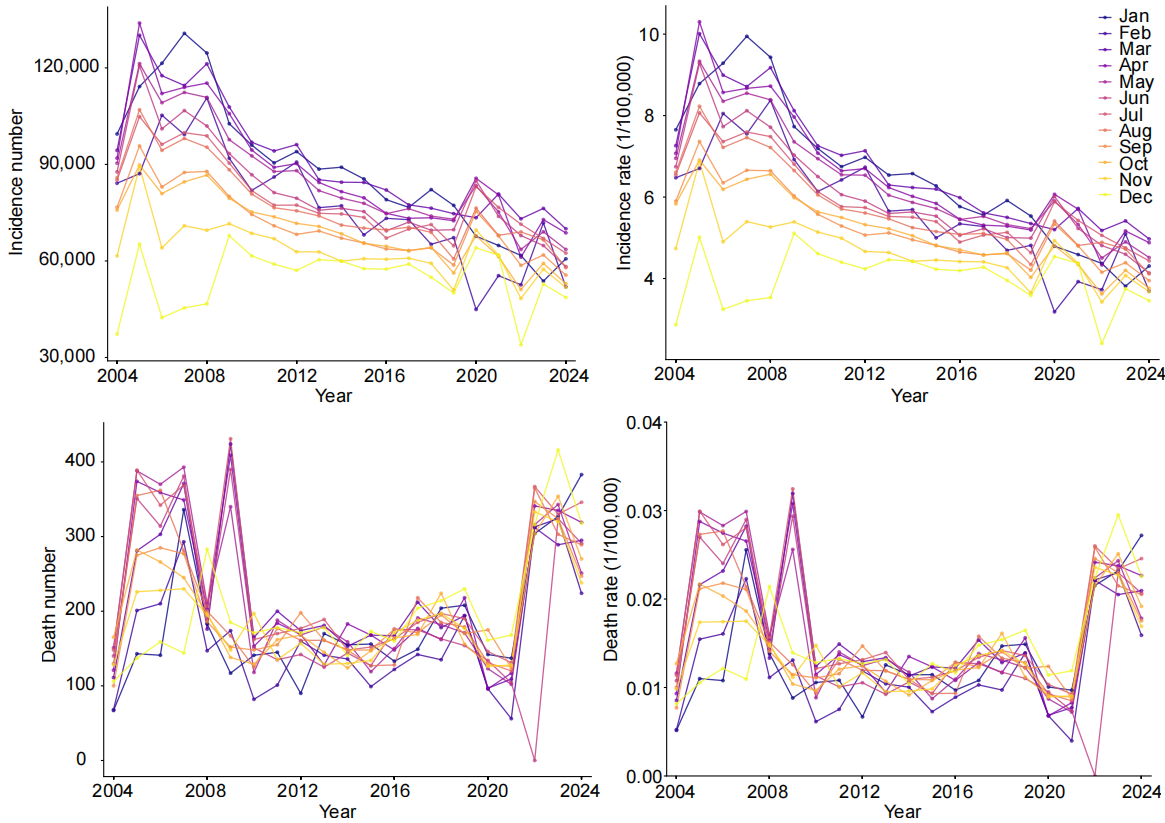


**FigureS4**. Temporal Distribution of Tuberculosis Incidence and Mortality rate

| **TableS3**. Fit and Forecast Performance Evaluation of SARIMA Model for Tuberculosis Incidence | | | | | | |
| --- | --- | --- | --- | --- | --- | --- |
| Data Type | Sample Size | MSE | RMSE | MAE | MAPE | sMAPE |
| Training Set (Fit) | 176 | 0.2097 | 0.458 | 0.2677 | 4.13 | 4.13 |
| Test Set (Forecast) | 76 | 0.3183 | 0.5642 | 0.4248 | 9.83 | 9.39 |
| Notes: MSE: Mean Squared Error, RMSE: Root Mean Squared Error, MAE: Mean Absolute Error, MAPE: Mean Absolute Percentage Error, sMAPE:Symmetric Mean Absolute Percentage Error. | | | | | | |

| **TableS4**. Fit and Forecast Performance Evaluation of SARIMA Model for Tuberculosis death | | | | | | |
| --- | --- | --- | --- | --- | --- | --- |
| Data Type | Sample Size | MSE | RMSE | MAE | MAPE | sMAPE |
| Training Set (Fit) | 176 | 0 | 0.0034 | 0.0024 | 17.42 | 16.62 |
| Test Set (Forecast) | 76 | 0 | 0.0069 | 0.0059 | Inf | 39.85 |
| Notes: MSE: Mean Squared Error, RMSE: Root Mean Squared Error, MAE: Mean Absolute Error, MAPE: Mean Absolute Percentage Error, sMAPE:Symmetric Mean Absolute Percentage Error. | | | | | | |


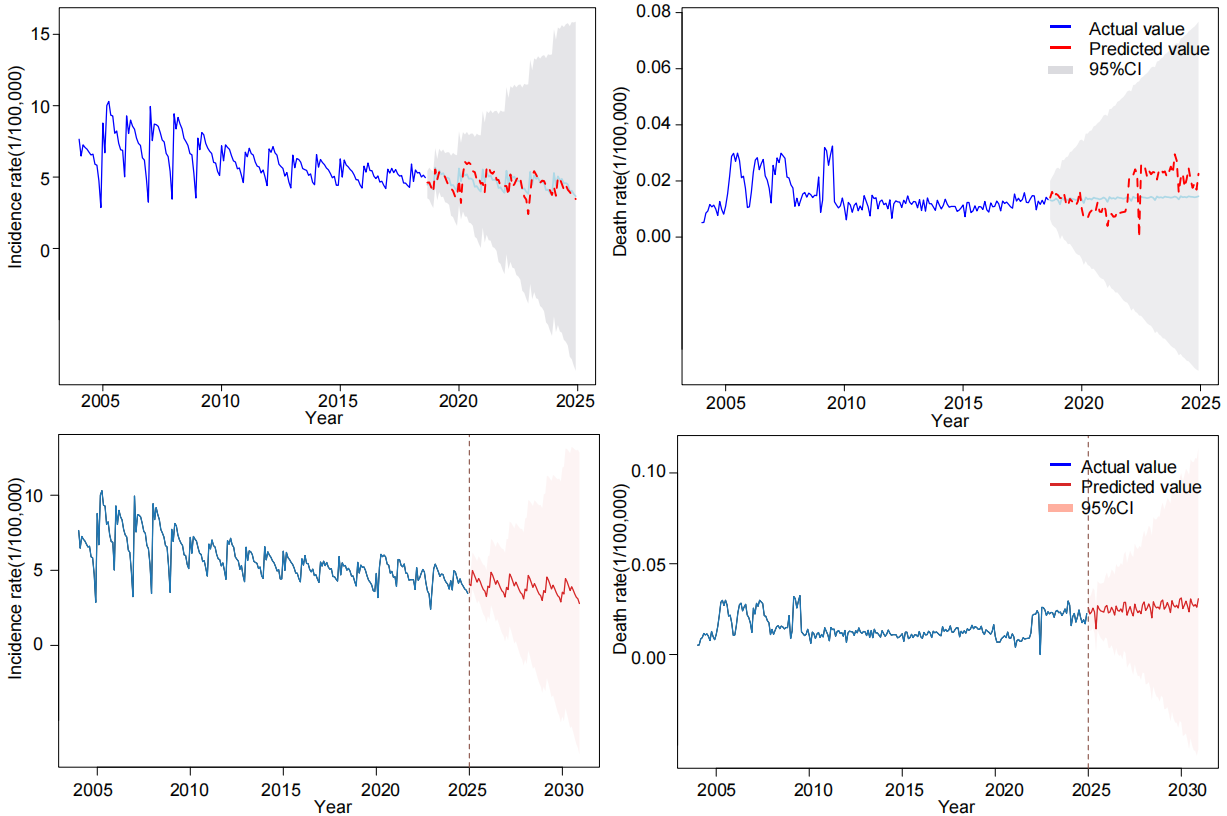


**FigureS5** Fitting and Forecasting of Tuberculosis Incidence and Mortality in Chinese Mainland

| **TableS5**. Monthly Incidence Rate Prediction Results in the Chinese Mainland from 2025 to 2030 | | | | |
| --- | --- | --- | --- | --- |
| Year | Month | Predict | 95%CI_lower | 95%CI_upper |
| 2025 | 1 | 4.059146788 | 3.106315023 | 5.011978553 |
| 2025 | 2 | 3.979145356 | 2.826820093 | 5.131470619 |
| 2025 | 3 | 4.987698224 | 3.779193488 | 6.19620296 |
| 2025 | 4 | 4.738556476 | 3.45022797 | 6.026884982 |
| 2025 | 5 | 4.478401609 | 3.12567321 | 5.831130009 |
| 2025 | 6 | 4.209451495 | 2.791084249 | 5.627818741 |
| 2025 | 7 | 4.454800929 | 2.975367038 | 5.93423482 |
| 2025 | 8 | 4.250421332 | 2.711682941 | 5.789159722 |
| 2025 | 9 | 3.95625677 | 2.360680081 | 5.551833458 |
| 2025 | 10 | 3.724275522 | 2.073711316 | 5.374839727 |
| 2025 | 11 | 3.612413716 | 1.908678001 | 5.316149431 |
| 2025 | 12 | 3.253435455 | 1.498121194 | 5.008749716 |
| 2026 | 1 | 3.945355953 | 1.955611878 | 5.935100029 |
| 2026 | 2 | 3.86054694 | 1.726146876 | 5.994947003 |
| 2026 | 3 | 4.872191443 | 2.649826447 | 7.094556439 |
| 2026 | 4 | 4.675848174 | 2.356553029 | 6.995143319 |
| 2026 | 5 | 4.379933518 | 1.972589809 | 6.787277227 |
| 2026 | 6 | 4.069603022 | 1.57534075 | 6.563865295 |
| 2026 | 7 | 4.321040755 | 1.74358285 | 6.898498659 |
| 2026 | 8 | 4.100797943 | 1.442428889 | 6.759166998 |
| 2026 | 9 | 3.844233256 | 1.107471931 | 6.58099458 |
| 2026 | 10 | 3.632317068 | 0.819295797 | 6.445338339 |
| 2026 | 11 | 3.528334912 | 0.641087957 | 6.415581868 |
| 2026 | 12 | 3.218801413 | 0.259181361 | 6.178421465 |
| 2027 | 1 | 3.864719165 | 0.653892417 | 7.075545914 |
| 2027 | 2 | 3.713336647 | 0.333675144 | 7.092998151 |
| 2027 | 3 | 4.758591283 | 1.266812827 | 8.250369738 |
| 2027 | 4 | 4.558158532 | 0.944897951 | 8.171419114 |
| 2027 | 5 | 4.265334927 | 0.539776062 | 7.990893793 |
| 2027 | 6 | 3.959836102 | 0.123177564 | 7.79649464 |
| 2027 | 7 | 4.215188771 | 0.271401037 | 8.158976506 |
| 2027 | 8 | 3.987604353 | -0.060817693 | 8.036026399 |
| 2027 | 9 | 3.730133259 | -0.420149115 | 7.880415633 |
| 2027 | 10 | 3.514436555 | -0.735320685 | 7.764193795 |
| 2027 | 11 | 3.410658783 | -0.936275187 | 7.757592753 |
| 2027 | 12 | 3.095802661 | -1.34619168 | 7.537797002 |
| 2028 | 1 | 3.751672812 | -0.94570143 | 8.449047053 |
| 2028 | 2 | 3.631520661 | -1.250903315 | 8.513944637 |
| 2028 | 3 | 4.660923587 | -0.354786999 | 9.676634173 |
| 2028 | 4 | 4.455631664 | -0.701999219 | 9.613262546 |
| 2028 | 5 | 4.165951359 | -1.124868182 | 9.4567709 |
| 2028 | 6 | 3.863512823 | -1.559204089 | 9.286229734 |
| 2028 | 7 | 4.116287851 | -1.434391721 | 9.666967422 |
| 2028 | 8 | 3.894104774 | -1.781977316 | 9.570186863 |
| 2028 | 9 | 3.632250784 | -2.166391257 | 9.430892826 |
| 2028 | 10 | 3.415731342 | -2.502986499 | 9.334449184 |
| 2028 | 11 | 3.310853713 | -2.725530282 | 9.347237709 |
| 2028 | 12 | 2.992133644 | -3.159675062 | 9.14394235 |
| 2029 | 1 | 3.649299158 | -2.755065529 | 10.05366384 |
| 2029 | 2 | 3.523282713 | -3.075636689 | 10.12220212 |
| 2029 | 3 | 4.555685282 | -2.192898075 | 11.30426864 |
| 2029 | 4 | 4.353150092 | -2.552555827 | 11.25885601 |
| 2029 | 5 | 4.061629624 | -2.993326767 | 11.11658602 |
| 2029 | 6 | 3.757166905 | -3.445713383 | 10.96004719 |
| 2029 | 7 | 4.010627617 | -3.336481819 | 11.35773705 |
| 2029 | 8 | 3.786897683 | -3.701954528 | 11.27574989 |
| 2029 | 9 | 3.527175061 | -4.100668317 | 11.15501844 |
| 2029 | 10 | 3.311516585 | -4.452878278 | 11.07591145 |
| 2029 | 11 | 3.207118682 | -4.691447773 | 11.10568514 |
| 2029 | 12 | 2.890855063 | -5.139649536 | 10.92135966 |
| 2030 | 1 | 3.546154393 | -4.742048274 | 11.83435706 |
| 2030 | 2 | 3.418848238 | -5.075157661 | 11.91285414 |
| 2030 | 3 | 4.451894814 | -4.206541755 | 13.11033138 |
| 2030 | 4 | 4.248712112 | -4.581116042 | 13.07854027 |
| 2030 | 5 | 3.957636669 | -5.036214216 | 12.95148755 |
| 2030 | 6 | 3.653714201 | -5.502883478 | 12.81031188 |
| 2030 | 7 | 3.907188616 | -5.408636506 | 13.22301374 |
| 2030 | 8 | 3.683480572 | -5.789170996 | 13.15613214 |
| 2030 | 9 | 3.42333724 | -6.203474308 | 13.05014879 |
| 2030 | 10 | 3.207387837 | -6.571199263 | 12.98597494 |
| 2030 | 11 | 3.102909712 | -6.825114345 | 13.03093377 |
| 2030 | 12 | 2.786009635 | -7.289242737 | 12.86126201 |
| CI:Confidence Interval | | | | |

| **TableS6**. Monthly Death Rate Prediction Results in the Chinese Mainland from 2025 to 2030 | | | | |
| --- | --- | --- | --- | --- |
| Year | Month | Predict | 95%CI_lower | 95%CI_upper |
| 2025 | 1 | 0.025868401 | 0.017982285 | 0.033754516 |
| 2025 | 2 | 0.022347211 | 0.01308278 | 0.031611642 |
| 2025 | 3 | 0.023316146 | 0.013208804 | 0.033423489 |
| 2025 | 4 | 0.025569523 | 0.014486619 | 0.036652428 |
| 2025 | 5 | 0.02349467 | 0.011530319 | 0.035459021 |
| 2025 | 6 | 0.014122379 | 0.001336119 | 0.026908638 |
| 2025 | 7 | 0.026862864 | 0.01330451 | 0.040421219 |
| 2025 | 8 | 0.025092622 | 0.010803826 | 0.039381419 |
| 2025 | 9 | 0.024027172 | 0.0090435 | 0.039010843 |
| 2025 | 10 | 0.023725987 | 0.008078268 | 0.039373706 |
| 2025 | 11 | 0.023325106 | 0.007040394 | 0.039609817 |
| 2025 | 12 | 0.026263915 | 0.009366207 | 0.043161623 |
| 2026 | 1 | 0.02700241 | 0.008763004 | 0.045241815 |
| 2026 | 2 | 0.022917754 | 0.003728466 | 0.042107042 |
| 2026 | 3 | 0.023424735 | 0.003401838 | 0.043447632 |
| 2026 | 4 | 0.025980432 | 0.005115274 | 0.04684559 |
| 2026 | 5 | 0.024353936 | 0.002682412 | 0.04602546 |
| 2026 | 6 | 0.0216989 | -0.000750284 | 0.044148083 |
| 2026 | 7 | 0.026709474 | 0.0035087 | 0.049910248 |
| 2026 | 8 | 0.024282493 | 0.000353723 | 0.048211263 |
| 2026 | 9 | 0.023844769 | -0.000790493 | 0.048480031 |
| 2026 | 10 | 0.025118307 | -0.000203744 | 0.050440357 |
| 2026 | 11 | 0.023343552 | -0.002647146 | 0.04933425 |
| 2026 | 12 | 0.028703096 | 0.002060527 | 0.055345665 |
| 2027 | 1 | 0.028759071 | 0.000758553 | 0.056759589 |
| 2027 | 2 | 0.021643747 | -0.007358619 | 0.050646113 |
| 2027 | 3 | 0.024270503 | -0.00562916 | 0.054170166 |
| 2027 | 4 | 0.026372046 | -0.004441011 | 0.057185103 |
| 2027 | 5 | 0.023216893 | -0.008480012 | 0.054913798 |
| 2027 | 6 | 0.021236556 | -0.011320457 | 0.053793568 |
| 2027 | 7 | 0.027771901 | -0.005623056 | 0.061166858 |
| 2027 | 8 | 0.024801308 | -0.009411077 | 0.059013693 |
| 2027 | 9 | 0.023078139 | -0.011932594 | 0.058088872 |
| 2027 | 10 | 0.024100375 | -0.011690903 | 0.059891652 |
| 2027 | 11 | 0.022463853 | -0.014091307 | 0.059019013 |
| 2027 | 12 | 0.027334898 | -0.009968505 | 0.064638301 |
| 2028 | 1 | 0.028993533 | -0.0103005 | 0.068287566 |
| 2028 | 2 | 0.024251901 | -0.016411473 | 0.064915275 |
| 2028 | 3 | 0.025595878 | -0.016267626 | 0.067459382 |
| 2028 | 4 | 0.027882586 | -0.015221577 | 0.070986749 |
| 2028 | 5 | 0.02560169 | -0.018702713 | 0.069906094 |
| 2028 | 6 | 0.020186273 | -0.025287135 | 0.065659681 |
| 2028 | 7 | 0.029060864 | -0.017552207 | 0.075673936 |
| 2028 | 8 | 0.026761062 | -0.020964469 | 0.074486593 |
| 2028 | 9 | 0.025662508 | -0.023150135 | 0.074475151 |
| 2028 | 10 | 0.026166598 | -0.023709467 | 0.076042664 |
| 2028 | 11 | 0.025038947 | -0.025878337 | 0.07595623 |
| 2028 | 12 | 0.029185133 | -0.022752499 | 0.081122764 |
| 2029 | 1 | 0.030020869 | -0.023634799 | 0.083676538 |
| 2029 | 2 | 0.024951067 | -0.030081315 | 0.079983449 |
| 2029 | 3 | 0.026259875 | -0.030043714 | 0.082563464 |
| 2029 | 4 | 0.028616996 | -0.028972839 | 0.08620683 |
| 2029 | 5 | 0.02639709 | -0.032447565 | 0.085241745 |
| 2029 | 6 | 0.02309299 | -0.036980534 | 0.083166515 |
| 2029 | 7 | 0.02965486 | -0.031622875 | 0.090932595 |
| 2029 | 8 | 0.027124375 | -0.035334359 | 0.089583108 |
| 2029 | 9 | 0.026154627 | -0.037463185 | 0.08977244 |
| 2029 | 10 | 0.027132874 | -0.037623274 | 0.091889022 |
| 2029 | 11 | 0.025587427 | -0.040287388 | 0.091462243 |
| 2029 | 12 | 0.030457317 | -0.036517484 | 0.097432119 |
| 2030 | 1 | 0.031163417 | -0.037592086 | 0.099918921 |
| 2030 | 2 | 0.02527707 | -0.044933624 | 0.095487764 |
| 2030 | 3 | 0.027176178 | -0.044389549 | 0.098741904 |
| 2030 | 4 | 0.029402274 | -0.0435358 | 0.102340347 |
| 2030 | 5 | 0.026754098 | -0.047527693 | 0.10103589 |
| 2030 | 6 | 0.023484141 | -0.052117741 | 0.099086022 |
| 2030 | 7 | 0.030636306 | -0.046262989 | 0.107535601 |
| 2030 | 8 | 0.027971802 | -0.050203378 | 0.106146982 |
| 2030 | 9 | 0.026636308 | -0.052794266 | 0.106066882 |
| 2030 | 10 | 0.027510531 | -0.053155902 | 0.108176963 |
| 2030 | 11 | 0.026033675 | -0.055849965 | 0.107917315 |
| 2030 | 12 | 0.030715698 | -0.05236732 | 0.113798715 |
| CI:Confidence Interval | | | | |
